# Supplementary material for: Effects of Dysbiosis and Dietary Manipulation on the Digestive Microbiota of a Detritivorous Arthropod
Source: MDPI journal article supplement (doi:10.3390/microorganisms9010148), 2021-01-11
Supplement: s1 [file s1]

A.

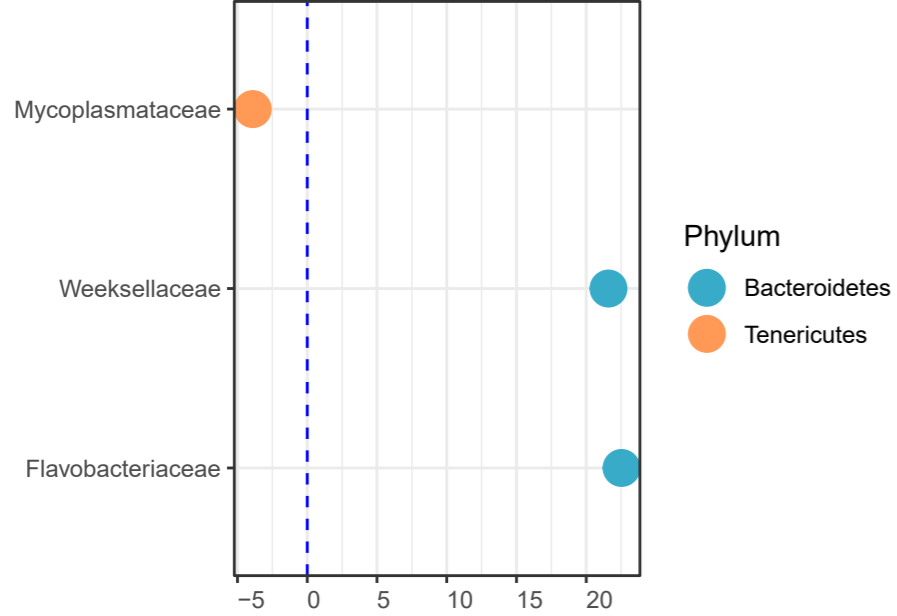

B.

D1

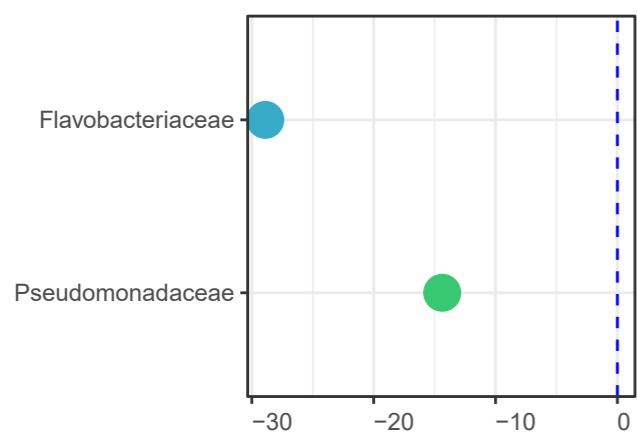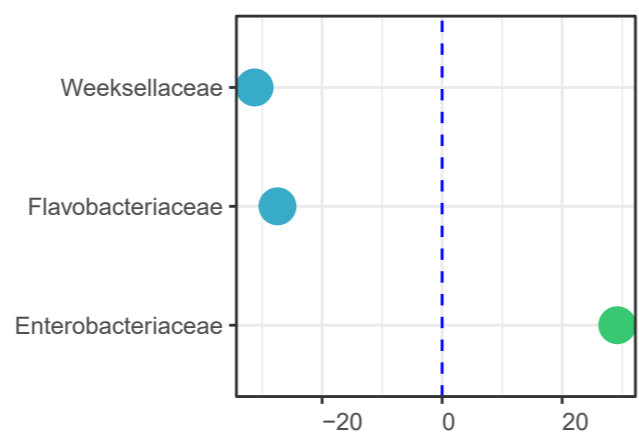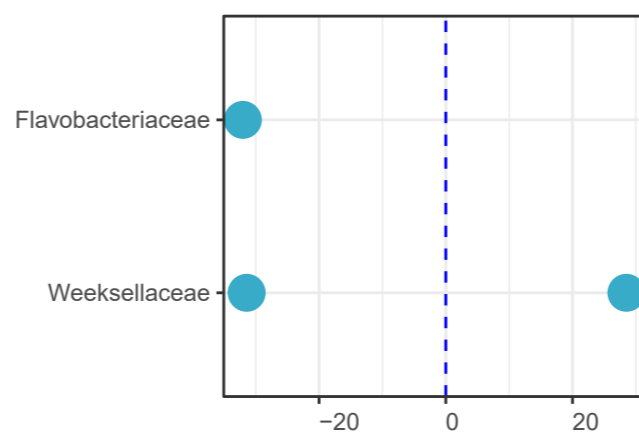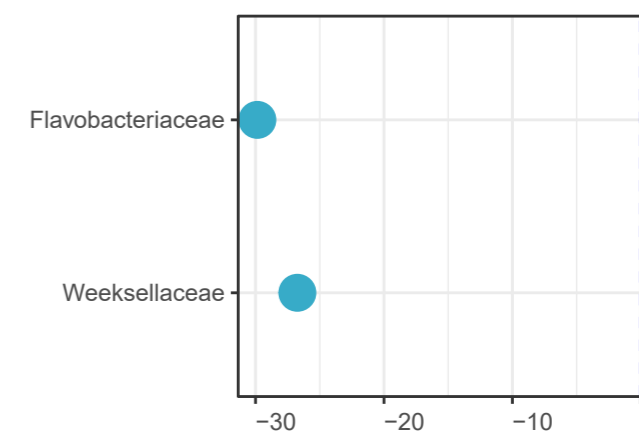

D2

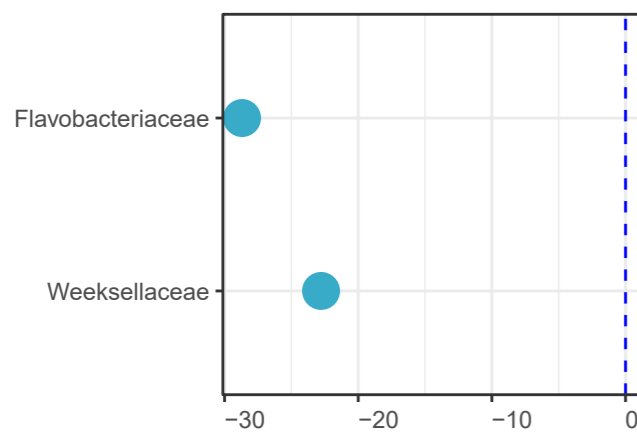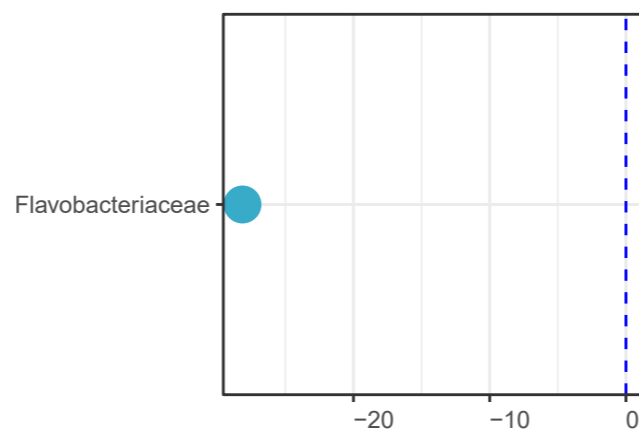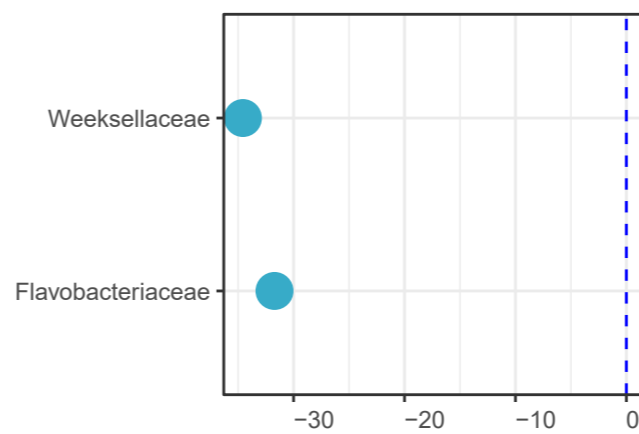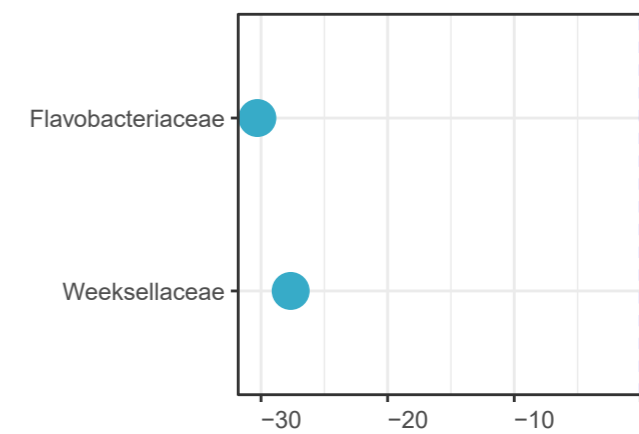

D3

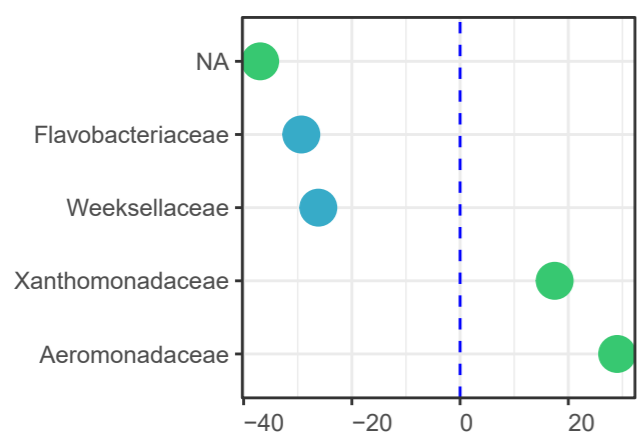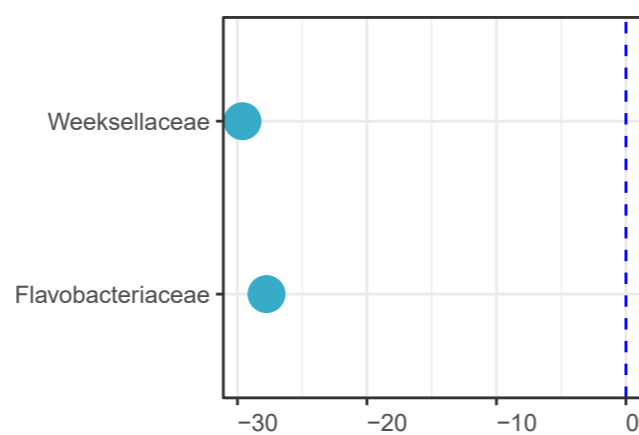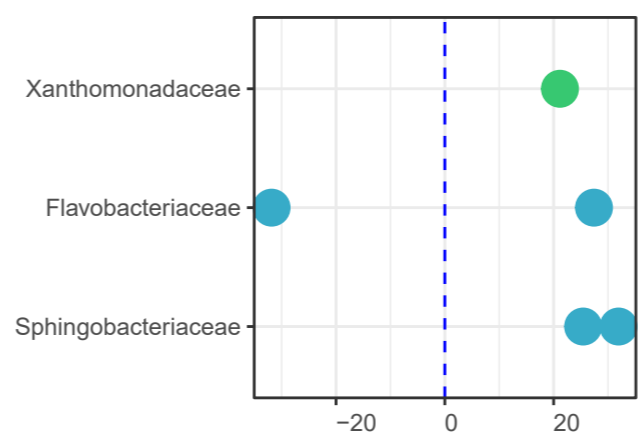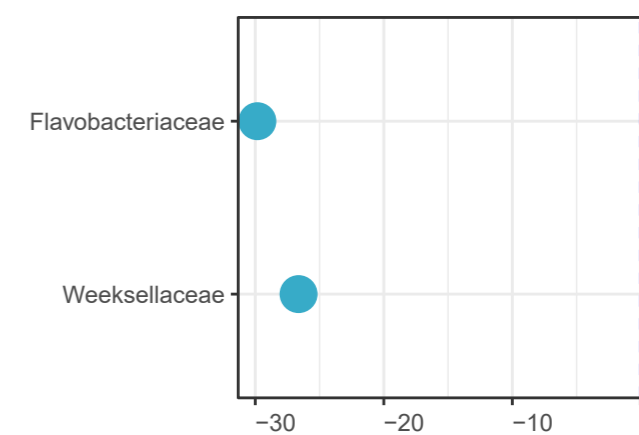

Sta.

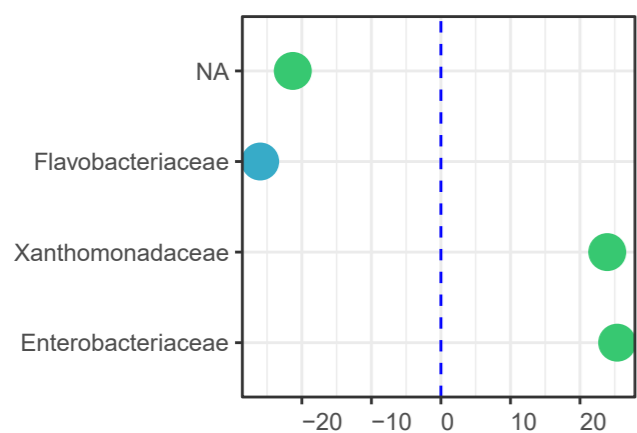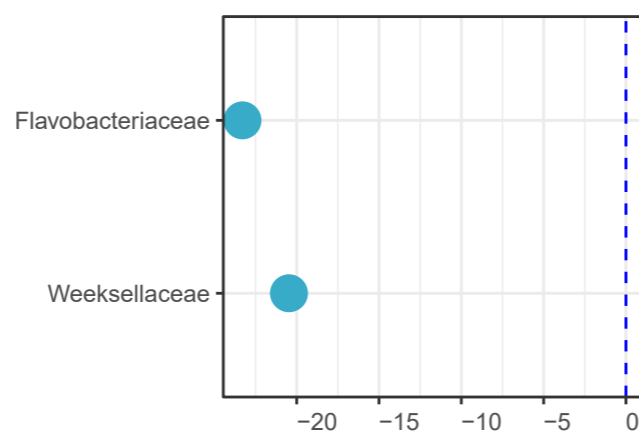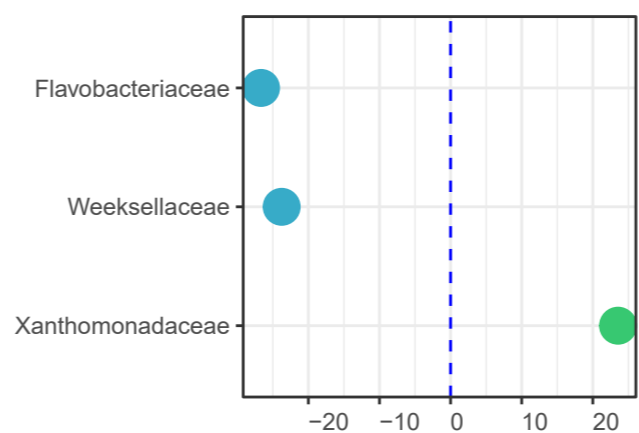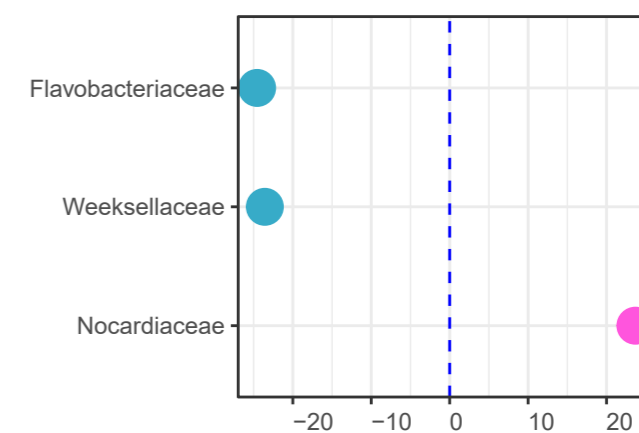

Phylum

- Proteobacteria
- Bacteroidetes
- Actinobacteria

log2FoldChange

45 days

60 days

90 days

120 days
