# Supplementary figures and images for: Effects of Dysbiosis and Dietary Manipulation on the Digestive Microbiota of a Detritivorous Arthropod
Source: MDPI journal article supplement (doi:10.3390/microorganisms9010148), 2021-01-11

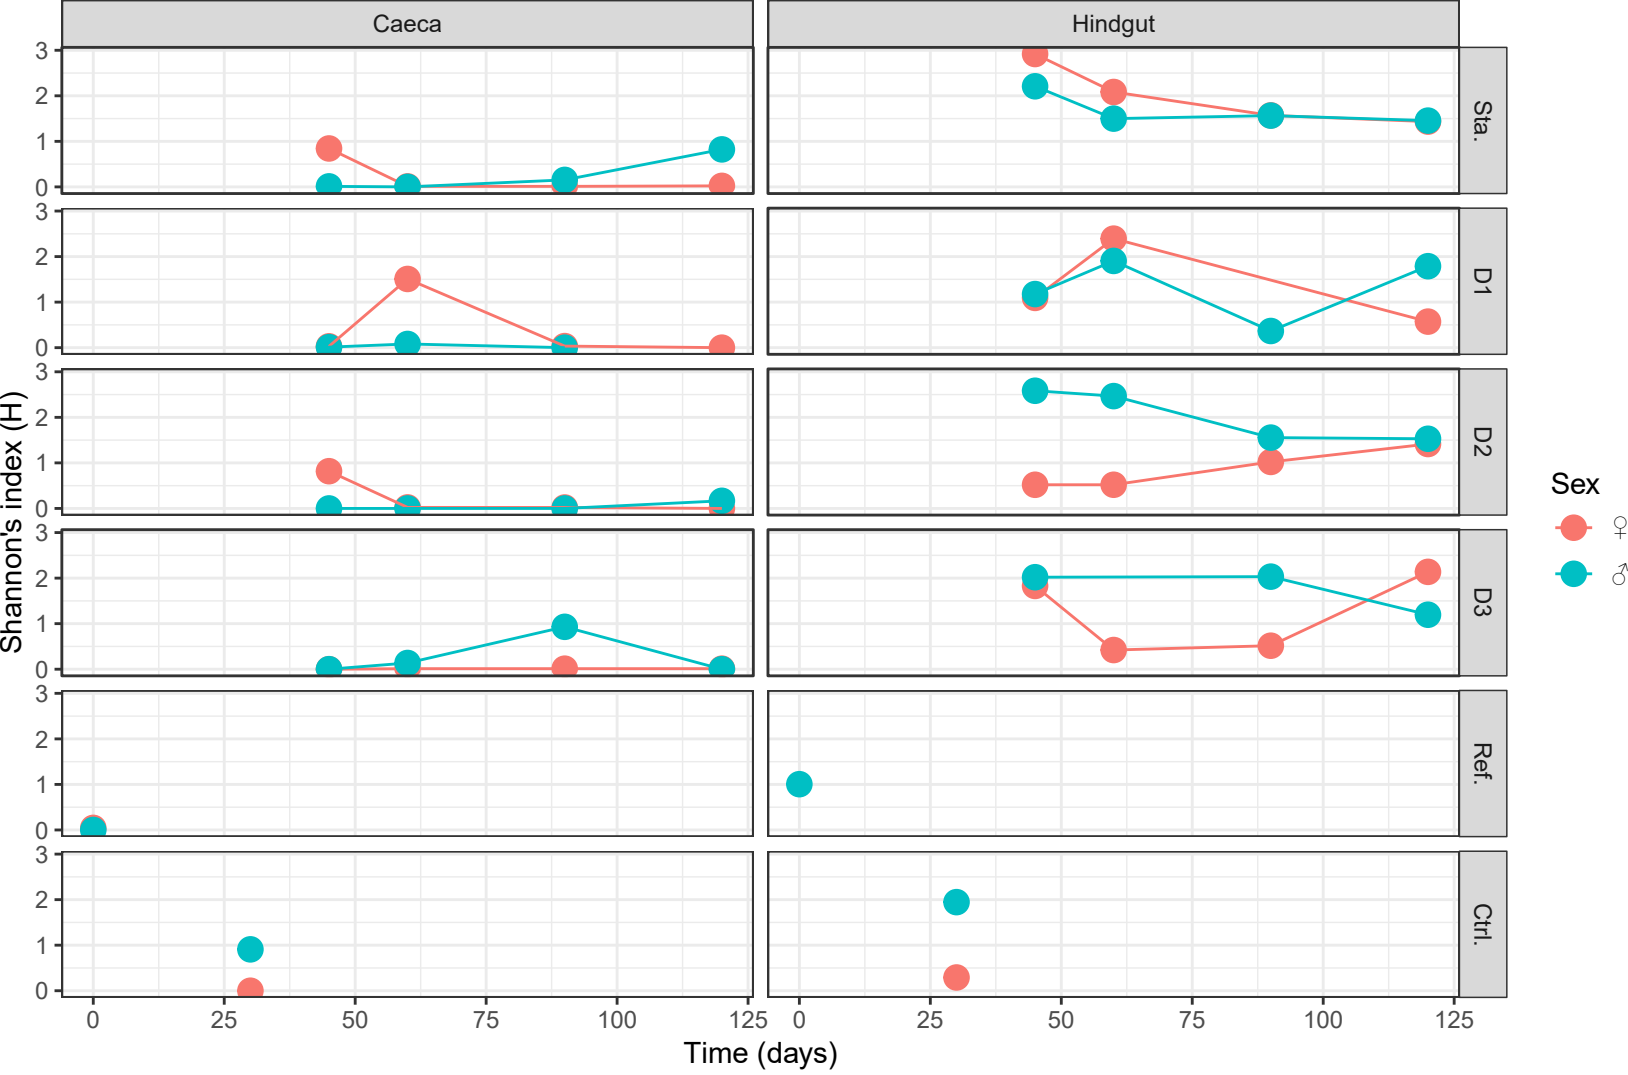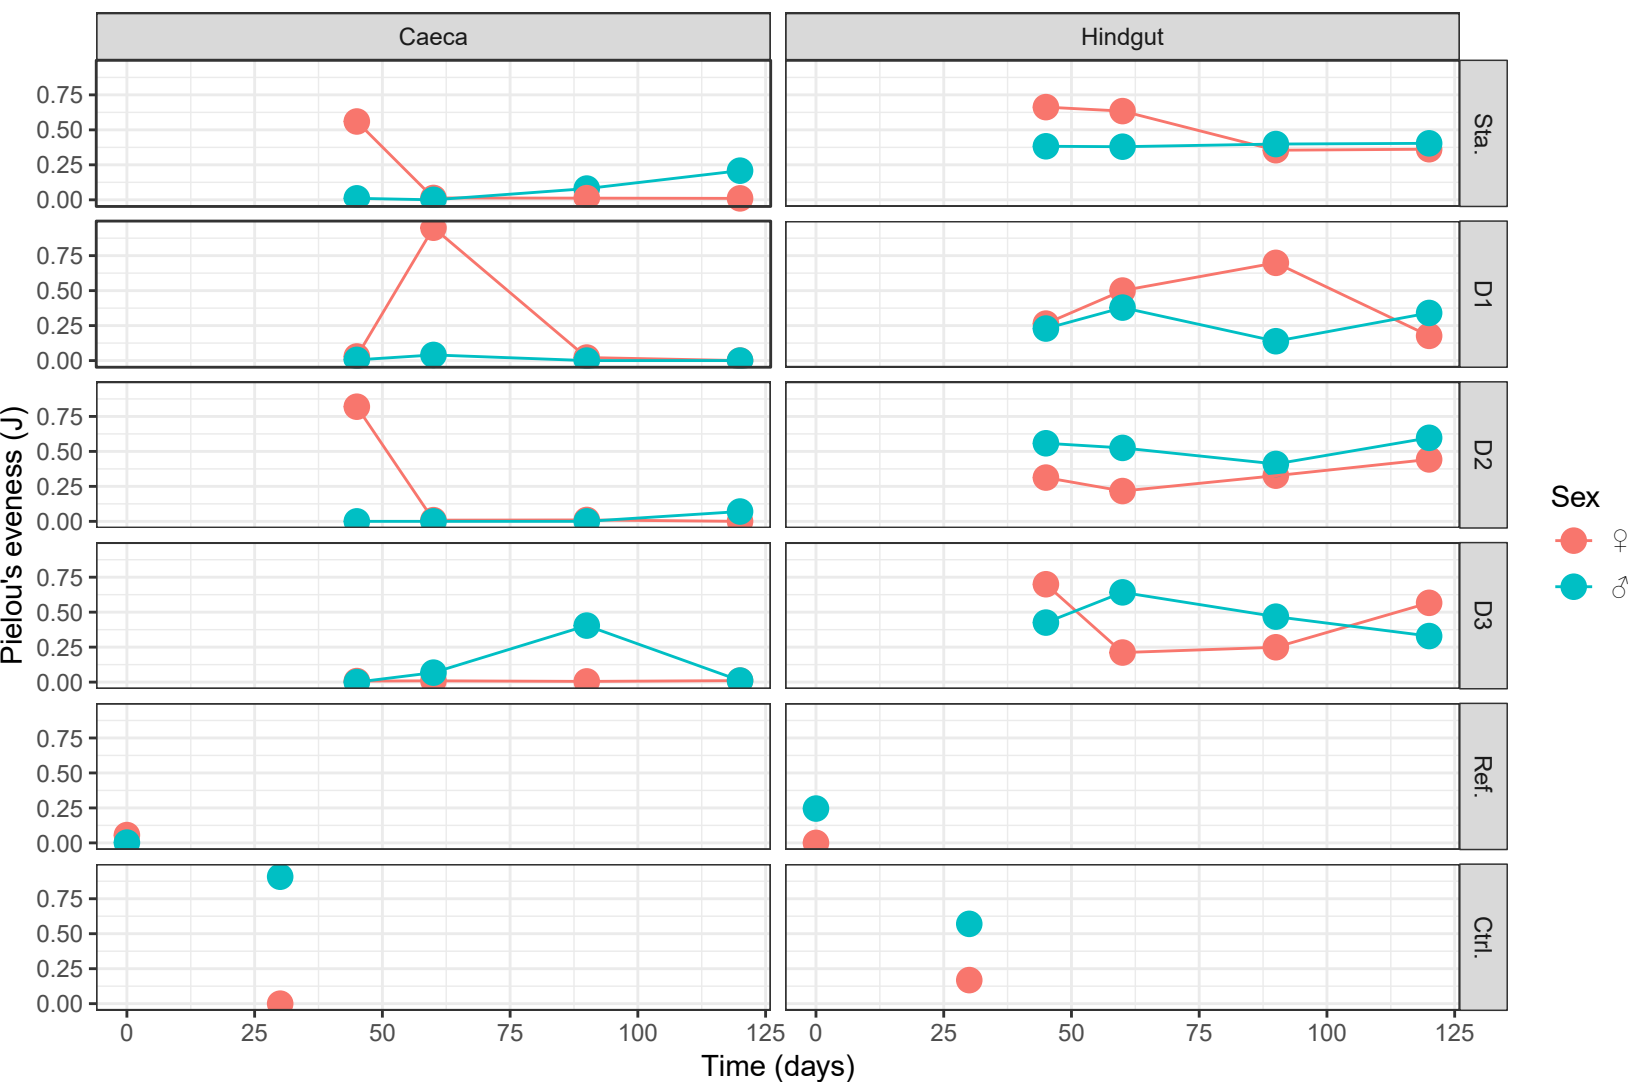

Supplement: s1 [file s1]

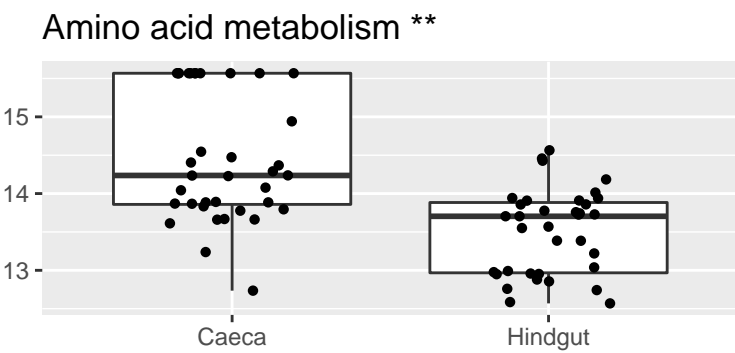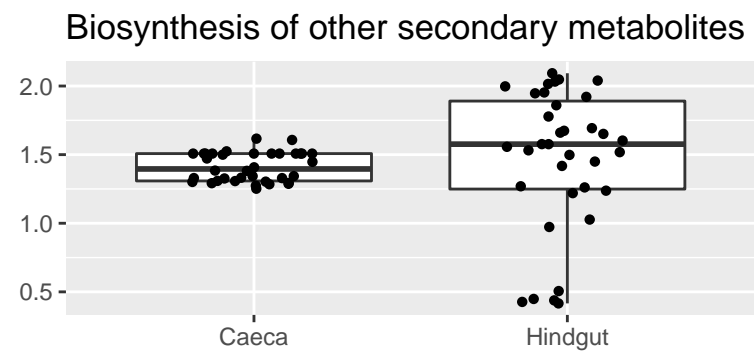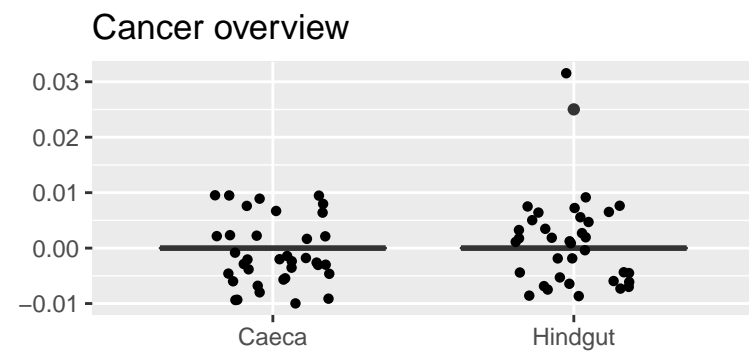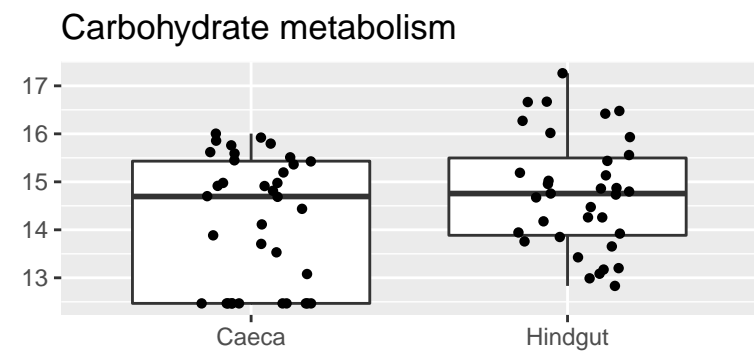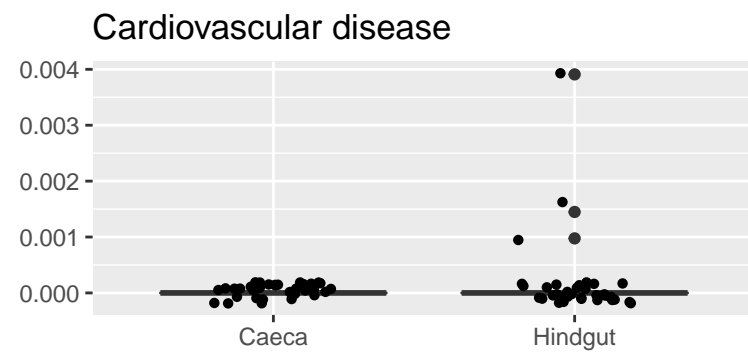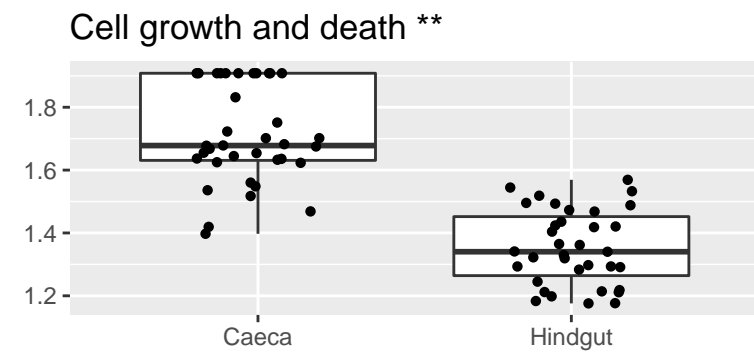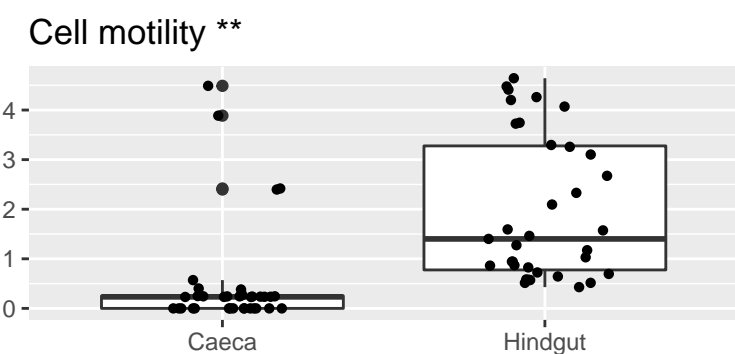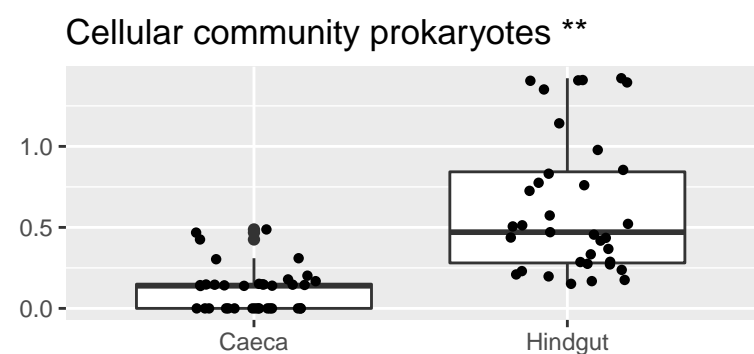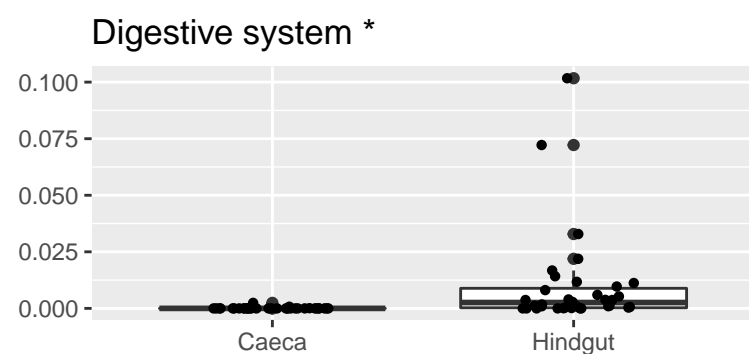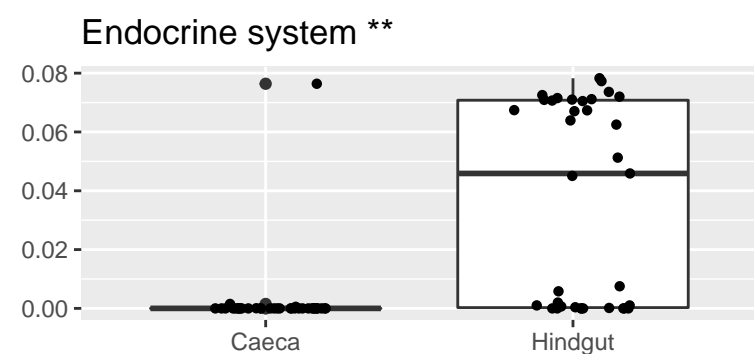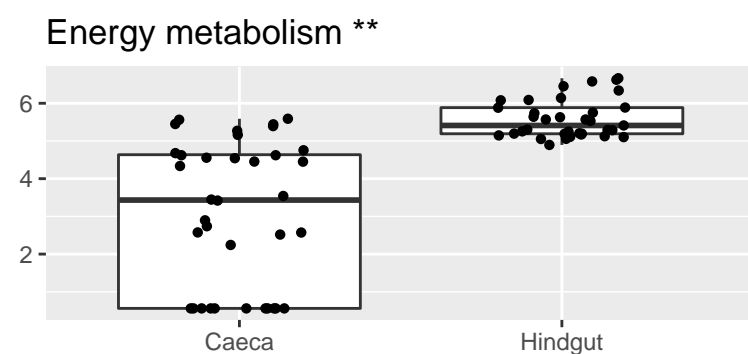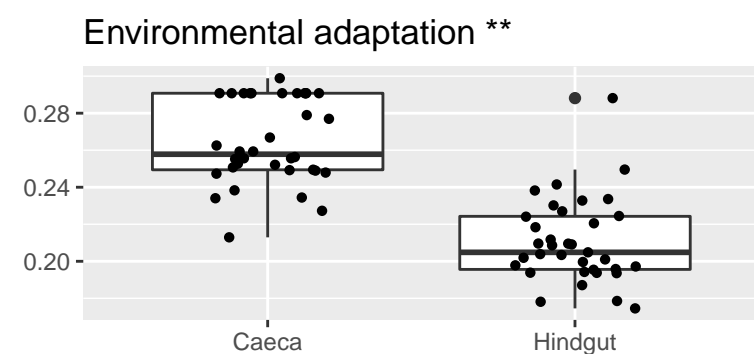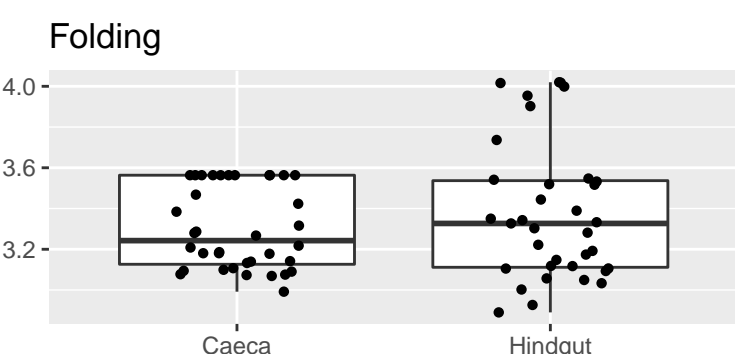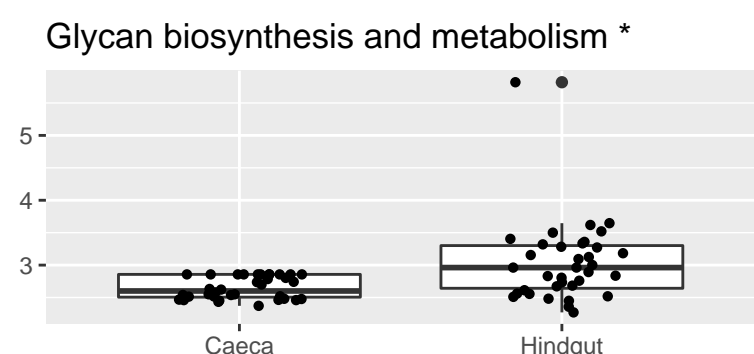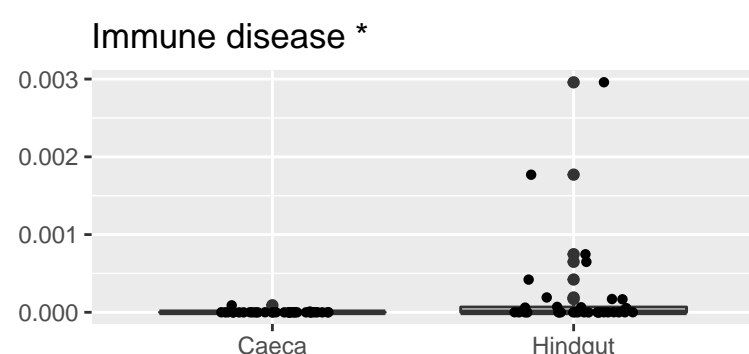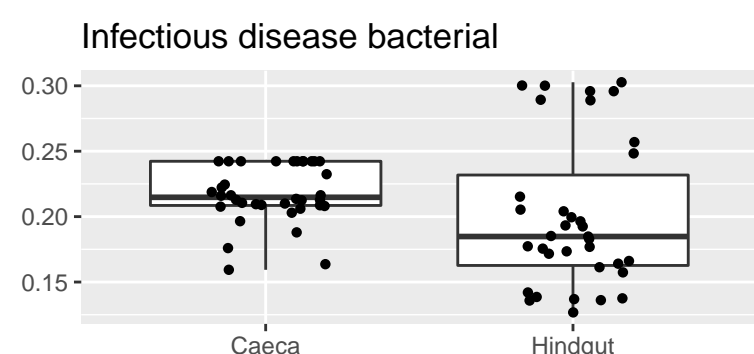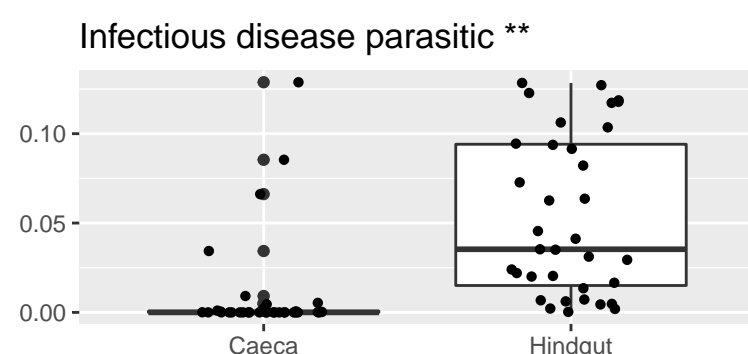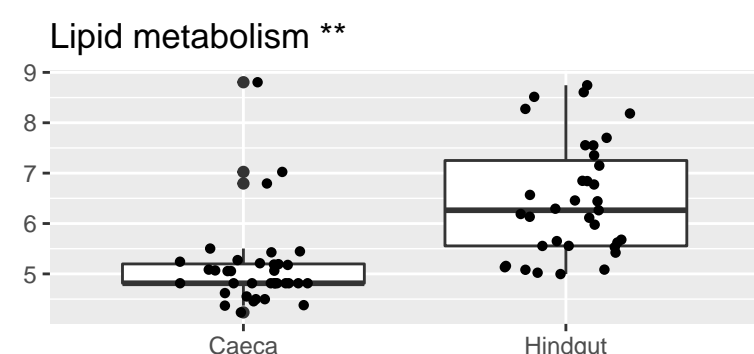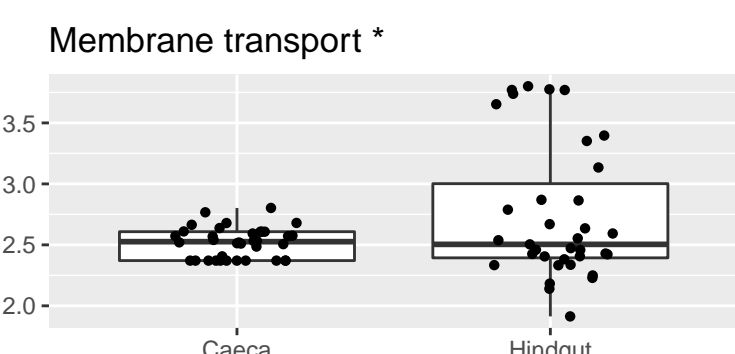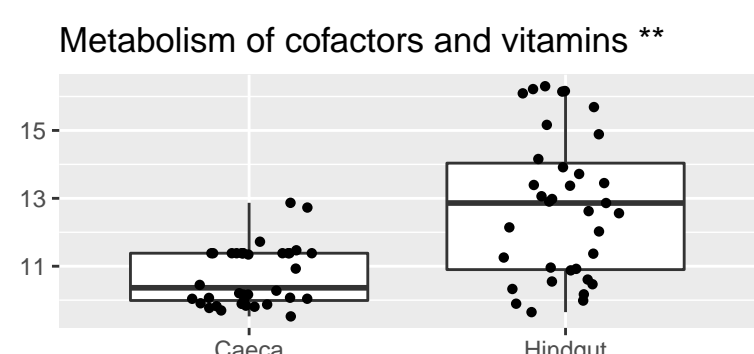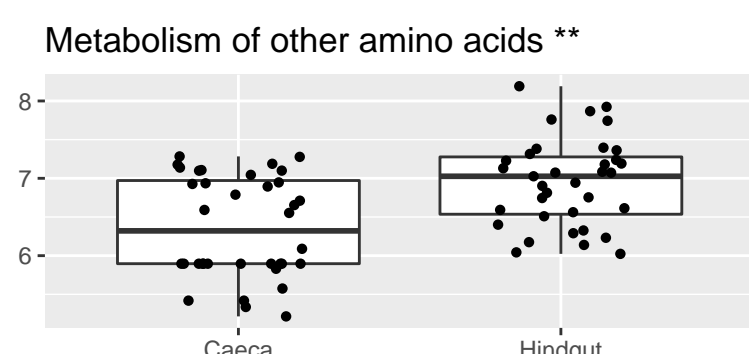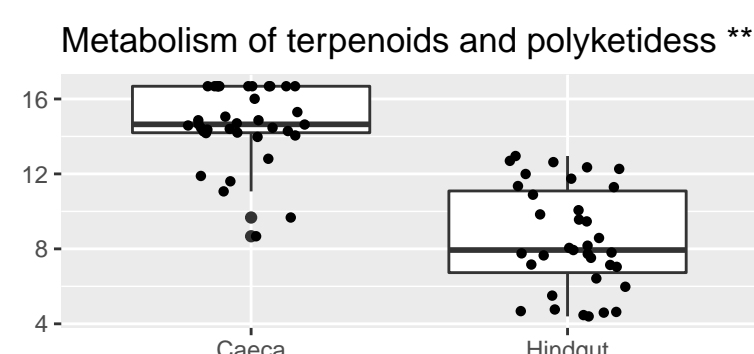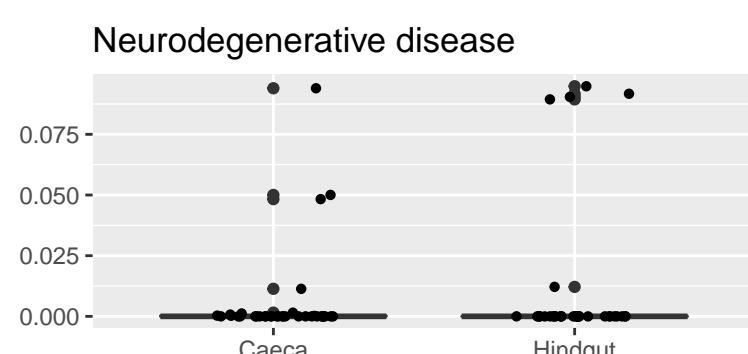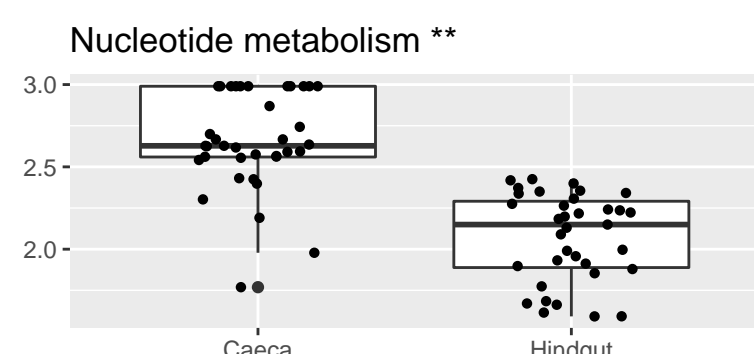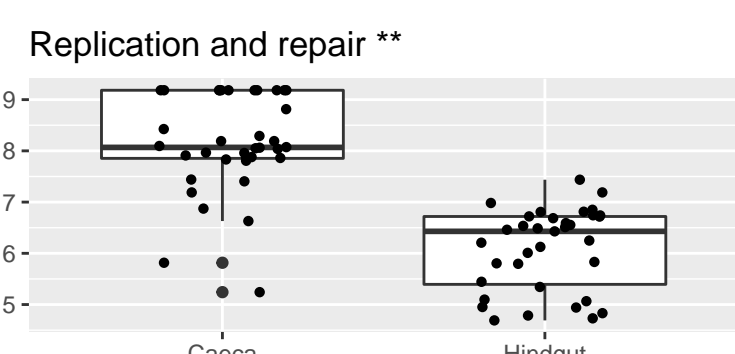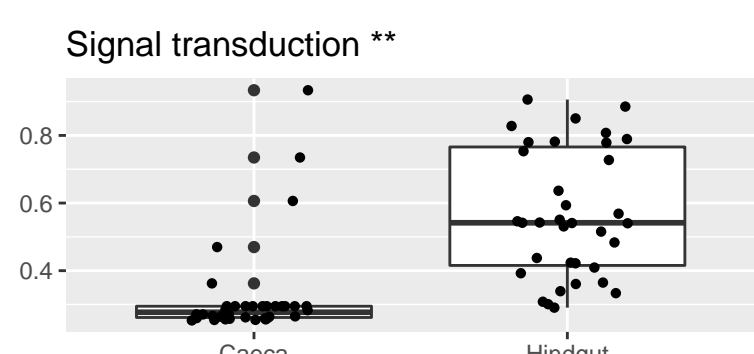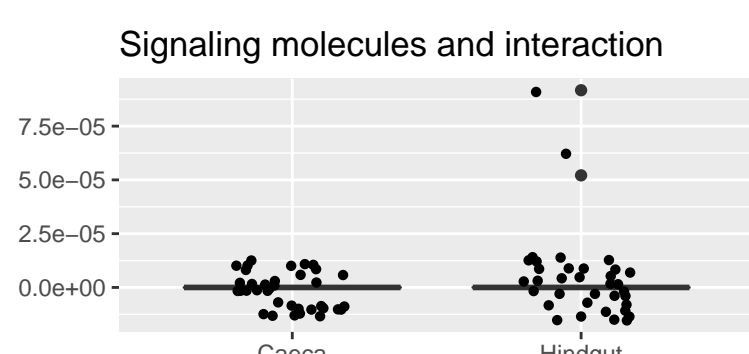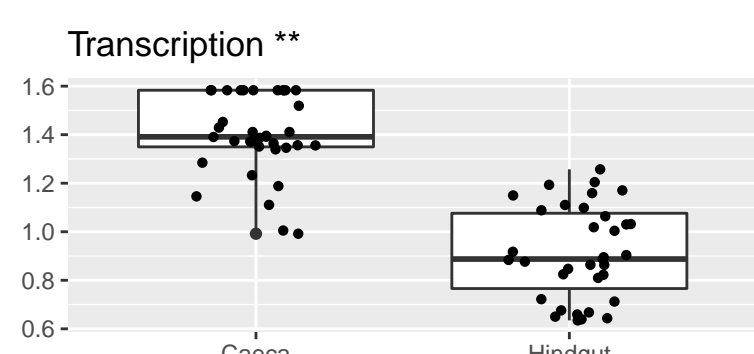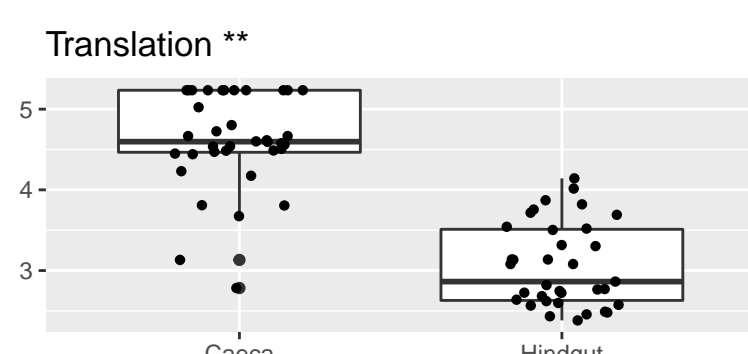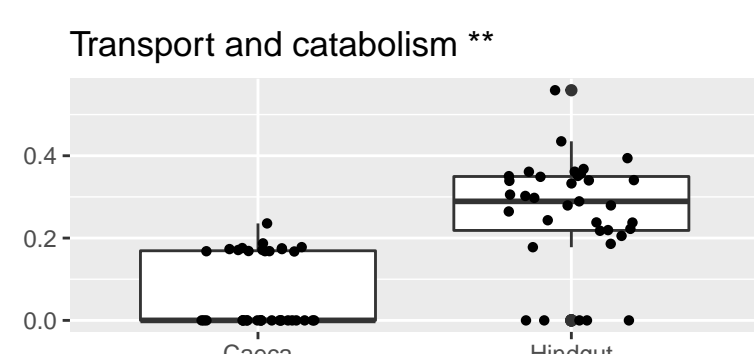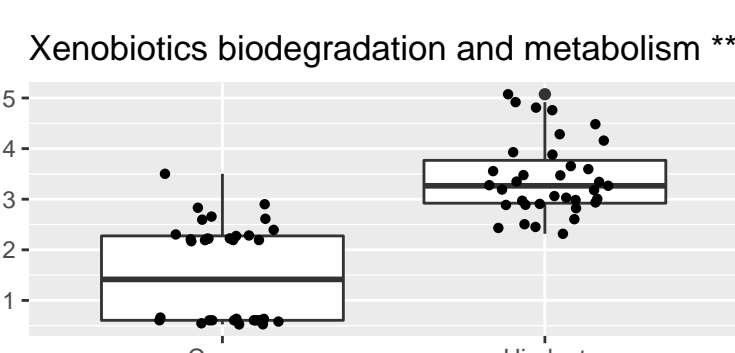

Supplement: s1 [file s1]
